# Supplementary material for: Fairness of Ratemaking for Catastrophe Insurance: Lessons from Machine Learning
Source: Atypon-hosted journal article supplement (doi:10.1287/isre.2022.1195), 2023-01-17
Supplement: isre.2022.1195.sm1.pdf [file isre.2022.1195.sm1.pdf]

## Online Supplemental Materials

### Appendix A: Summary of Key Terms in Alphabetical Order

| Term                    | Definition                                                                                                                                                                            |
|-------------------------|---------------------------------------------------------------------------------------------------------------------------------------------------------------------------------------|
| AAL                     | Average annual loss, the annualized expected cost of all stochastic losses covered by an insurance policy                                                                             |
| Actuarial fairness      | the principle that each entity being insured should pay for the risk it introduces to the insurance pool, also referred to as chance solidarity                                       |
| Catastrophe             | a natural disaster that occurs with a relatively small probability but causes significant and often sudden damages. Examples include flood, hurricane, earthquake, etc.               |
| Catastrophe insurance   | a type of insurance that covers losses caused by certain types of catastrophes, e.g., hurricane wind-storm insurance, flood insurance, etc.                                           |
| Exceedance probability  | the probability for an insurer to fall into insolvency as the total amount of covered loss exceeds the total capital prepared by the insurer (after taking into account reinsurance)  |
| Expense load            | the annualized cost of expenses incurred by the insurer (beyond AAL and capital requirement) as associated with an insurance policy                                                   |
| Insurance claim         | a request from a policy holder to the insurer for the compensation of losses covered by the insurance policy                                                                          |
| Insured loss            | the amount of damage sustained by a policy holder and compensated by the insurer in consequence of events covered by the insurance policy                                             |
| Insured peril           | a cause of loss (e.g., hurricane wind damage, flood damage) that is covered by an insurance policy                                                                                    |
| Insurer                 | an entity that offers insurance, also referred to as insurance company, insurance provider, underwriter                                                                               |
| Insurance policy        | a contract between the insurer and a policy holder to specify the potential claims (e.g., perils, limits) covered by the insurer in exchange of the premium paid by the policy holder |
| Insurance pool          | the set of all policies currently issued by an insurer for covering similar claims (e.g., those of the same peril type)                                                               |
| Insurance premium       | the amount of money charged to a policy holder for covering the potential claims specified in the insurance policy                                                                    |
| Loss distribution       | the probability distribution of the annualized insured loss associated with an insurance policy                                                                                       |
| Policy holder           | an entity that pays an insurer a premium in exchange for the coverage of certain potential claims.                                                                                    |
| Ratemaking              | the process of determining the premium charged by the insurer for an insurance policy                                                                                                 |
| Risk load for a policy  | the portion of the annualized cost of capital requirement (beyond the total AAL) that is allocated to an insurance policy                                                             |
| Risk-load location      | the process of allocating the total risk load for a set of insurance policies to the portion assigned to each policy in the set                                                       |
| Solidarity principle    | the principle that each entity being insured should pay the same premium (or a premium that commensurates with the entity's income level), also referred to as subsidizing solidarity |
| Total loss distribution | the probability distribution of the annualized sum of insured losses associated with a set of insurance policies                                                                      |
| Total risk load         | the annualized cost of capital requirement (beyond the total AAL) for a set of catastrophe insurance policies                                                                         |

## Appendix B: Mathematical Theorems and Proofs

### B.1. Proof of Theorem 1

**THEOREM 1.** For given  $\Omega$  and  $\mathcal{L}$ , the only  $r(s|\Omega, \mathcal{L})$  that satisfies all three axioms is Shapley Value

$$r_{SV}(s|\Omega, \mathcal{L}) = \sum_{S \subseteq \Omega \setminus \{s\}} \frac{(n-1)!|S|!}{n!} (\mathcal{L}(S \cup \{s\}) - \mathcal{L}(S)), \quad (8)$$

where  $(\cdot)!$  represents the factorial.

*Proof of Theorem 1.* To prove the theorem, we need to show that Equation 8 is both a sufficient and a necessary condition for  $r(s|\Omega, \mathcal{L})$  to satisfy the three axioms. We draw upon the proof of Proposition 2.1 by Ghorbani and Zou (2019) to construct our proof. Note that the only difference between the three axioms there and the three axioms in our paper is our second axiom, i.e., higher risk, higher pay. Our second axiom requires that, if two policies  $s_1$  and  $s_2$  satisfy  $\mathcal{L}(S \cup \{s_1\}) \geq \mathcal{L}(S \cup \{s_2\})$  for all  $S \subseteq \Omega \setminus \{s_1, s_2\}$ , then there must be  $r(s_1|\Omega, \mathcal{L}) \geq r(s_2|\Omega, \mathcal{L})$ . In contrast, Ghorbani and Zou (2019) only requires an *equality axiom*, i.e., there must be  $r(s_1|\Omega, \mathcal{L}) = r(s_2|\Omega, \mathcal{L})$  if  $s_1$  and  $s_2$  satisfy  $\mathcal{L}(S \cup \{s_1\}) = \mathcal{L}(S \cup \{s_2\})$  for all  $S \subseteq \Omega \setminus \{s_1, s_2\}$ . Clearly, our second axiom is stronger as it implies that the equality axiom must be true. Thus, the necessity proof for Equation 8 follows directly from that of Proposition 2.1 by Ghorbani and Zou (2019).

For the sufficiency proof, we only need to show that the Shapley value design in Equation 8 satisfies our second axiom, as the other two follow directly from Ghorbani and Zou (2019). Equation 8 yields

$$r_{SV}(s_1|\Omega, \mathcal{L}) - r_{SV}(s_2|\Omega, \mathcal{L}) = \sum_{S \subseteq \Omega \setminus \{s_1\}} \frac{(n-1)!|S|!}{n!} (\mathcal{L}(S \cup \{s_1\}) - \mathcal{L}(S)) - \sum_{S \subseteq \Omega \setminus \{s_2\}} \frac{(n-1)!|S|!}{n!} (\mathcal{L}(S \cup \{s_2\}) - \mathcal{L}(S)) \quad (9)$$

$$\begin{aligned} &= \sum_{S \subseteq \Omega \setminus \{s_1, s_2\}} \frac{(n-1)!|S|!}{n!} (\mathcal{L}(S \cup \{s_1\}) - \mathcal{L}(S)) + \\ &\quad \sum_{S \subseteq \Omega \setminus \{s_1, s_2\}} \frac{(n-1)!(|S|+1)!}{n!} (\mathcal{L}(S \cup \{s_2\} \cup \{s_1\}) - \mathcal{L}(S \cup \{s_2\})) - \\ &\quad \sum_{S \subseteq \Omega \setminus \{s_1, s_2\}} \frac{(n-1)!|S|!}{n!} (\mathcal{L}(S \cup \{s_2\}) - \mathcal{L}(S)) - \\ &\quad \sum_{S \subseteq \Omega \setminus \{s_1, s_2\}} \frac{(n-1)!(|S|+1)!}{n!} (\mathcal{L}(S \cup \{s_2\} \cup \{s_1\}) - \mathcal{L}(S \cup \{s_1\})) \\ &\geq 0. \end{aligned} \quad (10)$$

Note that the deduction from (10) to (11) is because  $\mathcal{L}(S \cup \{s_1\}) \geq \mathcal{L}(S \cup \{s_2\})$  for all  $S \subseteq \Omega \setminus \{s_1, s_2\}$ . This completes the sufficiency proof.

### B.2. Proof of Theorem 2

**THEOREM 2.** Consider two policies  $s$  and  $s'$  such that the loss distribution of  $s$  is independent of all other policies in  $\Omega$ , while the covariance between  $s'$  and any other policy  $s_j$  is positive and proportional to  $c$ . When  $n$  is sufficiently large, we have

$$\frac{r_S(s)}{r_S(s')} < \frac{r_{SV}(s)}{r_{SV}(s')} \sim \frac{r_{SD}(s)}{r_{SD}(s')} < \frac{r_V(s)}{r_V(s')} \sim \frac{r_{MV}(s)}{r_{MV}(s')} \sim \frac{r_{MS}(s)}{r_{MS}(s')} \quad (12)$$

when  $c = 0$  and  $\sigma(s) > \sigma(s')$ , and

$$\frac{r_{SV}(s)}{r_{SV}(s')} \sim \frac{r_{MV}(s)}{r_{MV}(s')} \sim \frac{r_{MS}(s)}{r_{MS}(s')} < \frac{r_{SD}(s)}{r_{SD}(s')} < \frac{r_V(s)}{r_V(s')} < \frac{r_S(s)}{r_S(s')} \quad (13)$$

when  $c = \sigma^2$  and  $\sigma(s) = \sigma(s')$ , where  $\sim$  represents asymptotic equality, and  $r_S$ ,  $r_V$ ,  $r_{SD}$ ,  $r_{MV}$ ,  $r_{MS}$ , and  $r_{SV}$  represent the risk-load allocation by the solidarity, variance, standard deviation, marginal variance, marginal surplus, and Shapley-value based methods, respectively.

*Proof of Theorem 2.* Consider the comparison between solidarity (i.e.,  $r_S$ ) and the rest of the allocation methods first. Obviously, except solidarity, which assigns equal risk load to all policies, all other methods assign a higher risk load to  $s$  (than  $s'$ ) in the first case and  $s'$  in the second case. This proves the position of  $r_S$  in (12) and (13).

To compare the rest of the allocation methods over a policy  $s$  (or  $s'$ ), one subtle issue that needs to be addressed is the dependency of the marginal variance and marginal surplus methods (i.e.,  $r_{MV}$  and  $r_{MS}$ ) on the order in which the policies are added to the pool. To arrive at a stable estimate, many existing implementations (e.g., Mango 1997) opt for a “leave-one-out” approach. That is, one first compute the marginal variance/surplus for each policy  $s_i$  when setting the existing pool as  $\Omega \setminus \{s_i\}$ , before normalizing the computed results to a sum of  $\mathcal{L}(\Omega)$ . We follow this approach when computing  $r_{MV}$  and  $r_{MS}$ .

To simplify the notations, we designate the policy under consideration, say  $s$ , as the  $n$ -th policy (i.e.,  $s_n$ ) in the pool. With this notation, the following formulae follow directly from the definitions of the existing allocation methods.

$$r_V \propto \lambda_n^2 \quad (14)$$

$$r_{SD} \propto \lambda_n \quad (15)$$

$$r_{MV} \propto \sigma^2 \lambda_n^2 + 2 \sum_{i=1}^{n-1} c \lambda_i \lambda_n = \sigma^2 \lambda_n^2 + 2(n-1)c \lambda \lambda_n \quad (16)$$

$$r_{MS} \propto \sqrt{\sum_{i=1}^n \sigma^2 \lambda_i^2 + 2 \sum_{i < j \leq n} c \lambda_i \lambda_j} - \sqrt{\sum_{i=1}^{n-1} \sigma^2 \lambda_i^2 + 2 \sum_{i < j < n} c \lambda_i \lambda_j} \quad (17)$$

**[Case 1]** ( $c = 0$ ). In this case, there is clearly  $r_{SD} \propto \lambda_n$ ,  $r_{MV} \propto \lambda_n^2$ , and  $r_V \propto \lambda_n^2$ . For  $r_{MS}$ , we can rewrite (17) as

$$\lim_{n \rightarrow \infty} r_{MS} \propto \sqrt{\sum_{i=1}^n \sigma^2 \lambda_i^2} - \sqrt{\sum_{i=1}^{n-1} \sigma^2 \lambda_i^2} \approx \frac{\lambda_n^2}{2 \sum_{i=1}^{n-1} \lambda_i^2} \propto \lambda_n^2 \quad (18)$$

In other words, among  $r_{SD}$ ,  $r_V$ ,  $r_{MV}$ , and  $r_{MS}$ , we have

$$\frac{r_{SD}(s)}{r_{SD}(s')} < \frac{r_V(s)}{r_V(s')} \sim \frac{r_{MV}(s)}{r_{MV}(s')} \sim \frac{r_{MS}(s)}{r_{MS}(s')}. \quad (19)$$

For  $r_{SV}$ , since our goal is to derive its asymptotic limit, we assign  $\sigma = 1$  and  $\lambda_i = 1$  for  $i \in [1, n-1]$  to simplify the notations without loss of generality. This yields

$$r_{SV} = \frac{1}{n} \left( \lambda_n + \sqrt{\lambda_n^2 + 1} - 1 + \sqrt{\lambda_n^2 + 4} - 2 + \dots + \sqrt{\lambda_n^2 + (n-1)^2} - (n-1) \right) \quad (20)$$

$$\approx \frac{\lambda_n}{n} + \left( \frac{1}{\sqrt{2}} + \frac{1}{\sqrt{5}} + \cdots + \frac{1}{\sqrt{1+(n-1)^2}} \right) \frac{\lambda_n - 1}{n} + \left( \frac{1}{2^{3/2}} + \frac{1}{5^{3/2}} + \cdots + \frac{1}{(1+(n-1)^2)^{3/2}} \right) \frac{(\lambda_n - 1)^2}{2n} \quad (21)$$

$$\approx \frac{1}{n} \left( \lambda_n + (\lambda_n - 1) \log n + \frac{\zeta(3)}{2} (\lambda_n - 1)^2 \right) \quad (22)$$

$$\propto \lambda_n, \quad (23)$$

where  $\zeta(\cdot)$  is the Riemann zeta function. Note that the transition from (20) to (21) follows Taylor expansion of  $f(\lambda_n) = \sqrt{\lambda_n^2 + c^2} - c$  at the point 1. The transition from (21) to (22) follows the approximation and limit of the sum of two well-known power series,

$$\sum_{r=1}^n \frac{1}{r} \approx \log n, \text{ and} \quad (24)$$

$$\lim_{n \rightarrow \infty} \sum_{r=1}^n \frac{1}{r^3} = \zeta(3) \approx 1.202, \quad (25)$$

where  $\zeta(3)$  is commonly known as Apéry's constant. Combining (19) and (23), we have

$$\frac{r_{SD}(s)}{r_{SD}(s')} \sim \frac{r_{SV}(s)}{r_{SV}(s')} < \frac{r_V(s)}{r_V(s')} \sim \frac{r_{MV}(s)}{r_{MV}(s')} \sim \frac{r_{MS}(s)}{r_{MS}(s')}. \quad (26)$$

**[Case 2]** ( $c = \sigma^2$ ). A key observation for this case is that, due to the perfect risk correlation between any pair in  $\Omega \setminus \{s\}$ , for all  $s_i$  where  $i \in [1, n-1]$  (i.e., all policies but  $s$ ), the marginal surplus for  $s_i$  when being added to any subset of  $\Omega \setminus \{s_i, s\}$  is  $\sigma$ . Once again, to simplify the notations, consider the case where  $\sigma = 1$  and  $\lambda_i = 1$  for all but  $s$ . We have

$$\frac{r_V(s)}{r_V(s')} = \lambda_n^2 \quad (27)$$

$$\frac{r_{SD}(s)}{r_{SD}(s')} = \lambda_n \quad (28)$$

$$\lim_{n \rightarrow \infty} \frac{r_{MV}(s)}{r_{MV}(s')} = \lim_{n \rightarrow \infty} \frac{\lambda_n^2}{1 + 2(n-1)} = 0 \quad (29)$$

$$\lim_{n \rightarrow \infty} \frac{r_{MS}(s)}{r_{MS}(s')} = \lim_{n \rightarrow \infty} \frac{\lambda_n^2}{2(n-1)} = 0 \quad (30)$$

$$\lim_{n \rightarrow \infty} \frac{r_{SV}(s)}{r_{SV}(s')} = \lim_{n \rightarrow \infty} \frac{\lambda_n}{n} = 0. \quad (31)$$

Here (27)-(29) follow directly from the definitions in (14)-(16), respectively. The earlier observation on the constant marginal surplus, combined with (17), yields (30). Similarly, recall from earlier discussions that  $r_{SV}$  is a weighted average of marginal surpluses. Thus, a constant marginal surplus implies  $r_{SV} = r_{MS}$  for  $s_i$  with  $i \in [1, n-1]$ . This, combined with (22), yields (31). Combining (27)-(31), we have

$$\frac{r_{SV}(s)}{r_{SV}(s')} \sim \frac{r_{MV}(s)}{r_{MV}(s')} \sim \frac{r_{MS}(s)}{r_{MS}(s')} < \frac{r_{SD}(s)}{r_{SD}(s')} < \frac{r_V(s)}{r_V(s')}. \quad (32)$$

The proof for the general case (where  $\sigma \neq 1$  and/or  $\lambda_i \neq 1$ ) follows directly in analogy.

### B.3. Proof of Theorem 3

**THEOREM 3.** *Algorithm FAST-SV returns an  $(\epsilon, \delta)$ -approximation of  $r_{\text{SV}}(s|\Omega, \mathcal{L})$ , i.e., with an estimation error  $\omega$  satisfying  $\Pr\{|\omega| < \epsilon\} > 1 - \delta$ , after making  $\mathcal{O}(1)$  calls to  $\mathcal{L}$  and incurring a computational cost of  $\mathcal{O}((n/\epsilon^2)\log(n/\delta))$ .*

*Proof of Theorem 3.* According to Theorem 8 in Jia et al. (2019b), which was proven using Hoeffding's inequality, Algorithm FAST-SV returns an  $(\epsilon, \delta)$ -approximation of  $r_{\text{SV}}(s|\Omega, \mathcal{L})$  if

$$m \geq \frac{2r^2n}{\epsilon^2} \log \frac{2n}{\delta}, \quad (33)$$

where  $r$  is the range of Shapley value, which is obviously a constant in our case as  $r_{\text{SV}}(s|\Omega, \mathcal{L})$  is, by definition, bounded from the above by  $\sigma(s)$ . Note from Algorithm FAST-SV that it makes  $c+1$ , i.e.,  $\mathcal{O}(1)$ , calls to  $\mathcal{L}(\cdot)$  and has a computational complexity of  $\mathcal{O}(m)$  (i.e., from the loop between Lines 5 and 7). Taking Inequality 33 into it, we have a computational cost of  $\mathcal{O}((n/\epsilon^2)\log(n/\delta))$  for Algorithm FAST-SV.

## Appendix C: Summary Statistics

Table 7 lists the summary statistics for the amount of loss. To highlight the geographic variation of losses, we grouped the claims into ten categories according to the first digit of the ZIP code in which the loss occurred. According to the design of ZIP code, this first digit represents its geographic region. For example, the regions most frequently suffer flood damage from hurricanes are 3\* (i.e., the southeast region covering Florida, Alabama, etc.) and 7\* (i.e., the southwest region covering Texas, Louisiana, etc.). Indicatively, the two groups have the largest number of claims (**n**) and the highest average loss ( $\bar{x}$ ) in the table. Table 7 also shows that, for all groups, the standard deviation (**s**) far exceeds the average loss ( $\bar{x}$ ), which is in turn higher than the median loss ( $\tilde{x}$ ). In other words, the loss distribution exhibits both a wide dispersion and a positive skew (i.e., a heavy-tailed distribution), two features typical of catastrophic losses (Embrechts et al. 2013).

**Table 7 Summary Statistics for NFIP Claim Dataset**

| Var  | ZIP | n       | Min  | q <sub>1</sub> | $\tilde{x}$ | $\bar{x}$ | q <sub>3</sub> | Max        | s        |
|------|-----|---------|------|----------------|-------------|-----------|----------------|------------|----------|
| Loss | 0*  | 241387  | 0.01 | 3245.50        | 10014.38    | 31093.53  | 32165.04       | 4022518.64 | 61275.82 |
|      | 1*  | 203996  | 0.01 | 2933.91        | 10212.47    | 33587.16  | 37658.36       | 9467720.05 | 73864.06 |
|      | 2*  | 187612  | 0.01 | 3118.10        | 8733.00     | 23348.97  | 23976.09       | 2054595.38 | 45666.26 |
|      | 3*  | 316492  | 0.01 | 3117.69        | 10540.17    | 35368.06  | 35292.54       | 1000000.00 | 82350.71 |
|      | 4*  | 66825   | 6.76 | 2165.82        | 6585.40     | 17365.26  | 18518.92       | 100000.00  | 36707.33 |
|      | 5*  | 42993   | 0.01 | 1671.29        | 6132.01     | 21797.53  | 20000.00       | 125000.00  | 52971.74 |
|      | 6*  | 89982   | 0.01 | 2176.18        | 6563.61     | 18802.33  | 18878.06       | 1007405.42 | 42434.89 |
|      | 7*  | 702087  | 0.01 | 5000.00        | 22435.35    | 54298.85  | 77095.46       | 9023557.85 | 77406.53 |
|      | 8*  | 10297   | 0.01 | 1938.57        | 6500.15     | 21974.97  | 19563.70       | 100000.00  | 50737.02 |
|      | 9*  | 53138   | 0.01 | 2496.30        | 7896.72     | 21562.16  | 23052.36       | 140000.00  | 43822.25 |
|      | all | 1914809 | 0.01 | 3369.52        | 11963.59    | 38236.44  | 44000.00       | 1000000.00 | 70803.31 |

*Note.* **Var** = Variable. **ZIP** = first digit of the property ZIP code. **n** = number of records. **Min** = minimum. **q<sub>1</sub>** = first quartile.  $\tilde{x}$  = median.  $\bar{x}$  = mean. **q<sub>3</sub>** = third quartile. **Max** = maximum. **s** = standard deviation. Loss = Total payout for a claim in 2020 dollars.

Table 8 lists the summary statistics for the joined dataset of NFIP policies and Census sociodemographic variables. As can be seen from the table, the sociodemographic variables vary widely by region. For example, the percentage of African Americans (**race**) differ by nearly an order of magnitude between the mountain states (2% for ZIP = 8\*) and the mid-Atlantic region (18% for ZIP = 2\*). Similarly, there is an uneven distribution of policies across regions. The hurricane-prone southeast (3\*) and southwest (7\*) regions, for example, account for 64% of all policies in the pool.

**Table 8** Summary Statistics for NFIP Policy Dataset

| <b>ZIP</b> | <b>n</b> | <b>age</b> | <b>race</b> | <b>income</b> |
|------------|----------|------------|-------------|---------------|
| 0*         | 22405    | 46.16      | 0.04        | 104706.18     |
| 1*         | 18847    | 43.27      | 0.09        | 99296.09      |
| 2*         | 38604    | 42.10      | 0.18        | 71449.21      |
| 3*         | 169194   | 48.83      | 0.11        | 69967.86      |
| 4*         | 46075    | 40.05      | 0.05        | 59737.44      |
| 5*         | 6409     | 40.81      | 0.02        | 90085.74      |
| 6*         | 4162     | 37.58      | 0.07        | 76958.88      |
| 7*         | 130341   | 36.78      | 0.18        | 77066.81      |
| 8*         | 8728     | 43.65      | 0.02        | 100128.38     |
| 9*         | 19815    | 42.30      | 0.03        | 81396.19      |
| all        | 464580   | 42.15      | 0.08        | 83079.28      |

*Note.* **age**, **race**, **income** are per-policy average.
